# Supplementary material
Source: MDPI journal article supplement (https://www.mdpi.com/1999-4907/12/6/771)
Supplement: s1 [file s1]

**Table S1.** Analysis of PWN in agar blocks after treatment with different chemicals.

| Distance<br>Chemicals                  | Distance      |               |               |
|----------------------------------------|---------------|---------------|---------------|
|                                        | 2cm           | 4cm           | 6cm           |
| Control                                | 23 ± 4.83 A   | 25 ± 14.39 A  | 33 ± 2.82 A   |
| KCl                                    | 89 ± 5.29 A   | 85 ± 6.06 A   | 76 ± 2.49 A   |
| NaCl                                   | 96 ± 5.60 A   | 87 ± 14.93 AB | 97 ± 2.08 A   |
| MnCl <sub>2</sub>                      | 22 ± 3.06 A   | 35 ± 4.60 A   | 35 ± 3.33 A   |
| CrCl <sub>2</sub> ·2.5H <sub>2</sub> O | 20 ± 8.62 A   | 22 ± 3.56 AB  | 38 ± 10.39 A  |
| NaF                                    | 28 ± 8.55 A   | 35 ± 3.56 AB  | 45 ± 8.36 B   |
| Atropine sulfate                       | 34 ± 11.49 A  | 50 ± 3.39 A   | 42 ± 6.06 A   |
| DDVP                                   | 8 ± 3.39 A    | 17 ± 10.43 B  | 17 ± 6.06 B   |
| CuSO <sub>4</sub> ·5H <sub>2</sub> O   | 9 ± 2.49 A    | 22 ± 10.43 B  | 10 ± 10.37 AB |
| Diquat dibromide                       | 96 ± 11.49 A  | 102 ± 2.83 A  | 108 ± 5.06 A  |
| Kerosene                               | 132 ± 6.06 A  | 187 ± 6.33 B  | 211 ± 2.08 C  |
| β-Humulene                             | 123 ± 8.72 AB | 156 ± 2.08 B  | 204 ± 11.4 C  |
